# Supplementary material
Source: publisher figshare collection journal article supplement (https://acs.figshare.com/ndownloader/files/5177923)
Supplement: Supplementary file 1 [file 5177923]

Supporting information for

**An ideal one-dimensional antiferromagnetic spin system observed in hydrogen-bonded naphth[2,3-*d*]imidazol-2-yl nitronyl nitroxide crystal: the role of hydrogen bond**

Hideaki Nagashima, Hidenari Inoue, and Naoki Yoshioka\*

**Figure 1S.** Variation of the Fermi contact terms and the Mulliken spin densities of the hydrogen atoms with changing the dihedral angles between the aryl rings and the ONCNO moieties (UB3LYP/6-31G\*//AM1).

**Figure 2S.** Angular dependence of calculated  $J$  values (O: UB3LYP/4-31G; ●: UBLYP/4-31G).

**Figure 3S.** Angular dependence of calculated  $J$  values (O: UB3LYP/4-31G; ●: UBLYP/4-31G).

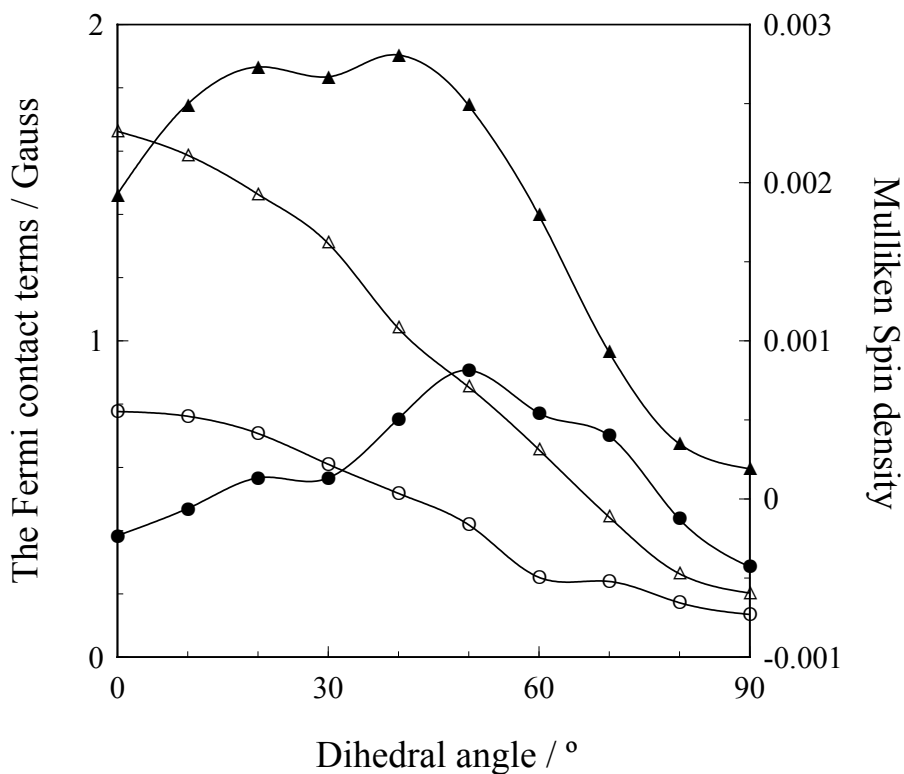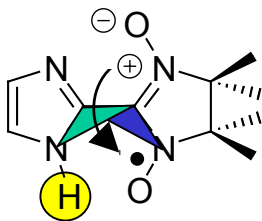

Imidazol-2-yl nitronyl nitroxide (**2**)  
 Fermi contact terms (O)  
 Mulliken spin density (●)

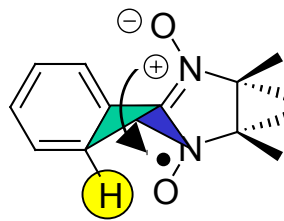

Phenyl nitronyl nitroxide  
 Fermi contact terms (Δ)  
 Mulliken spin density (▲)

**Figure 1S.** Variation of the Fermi contact terms and the Mulliken spin densities of the hydrogen atoms with changing the dihedral angles between the aryl rings and the ONCNO moieties (UB3LYP/6-31G\*\*//AM1).

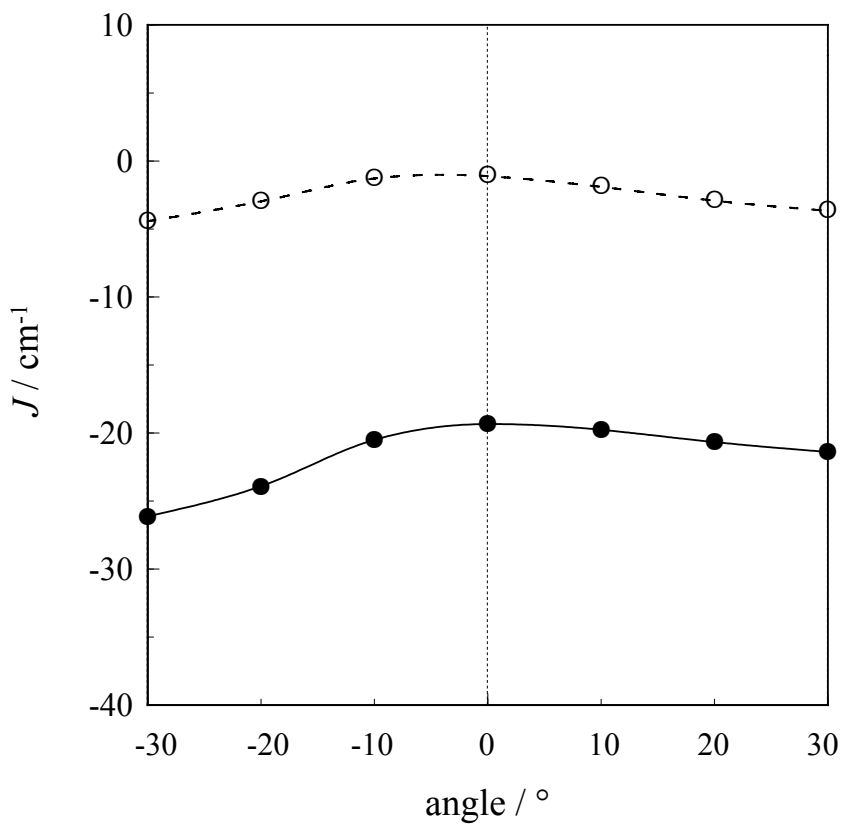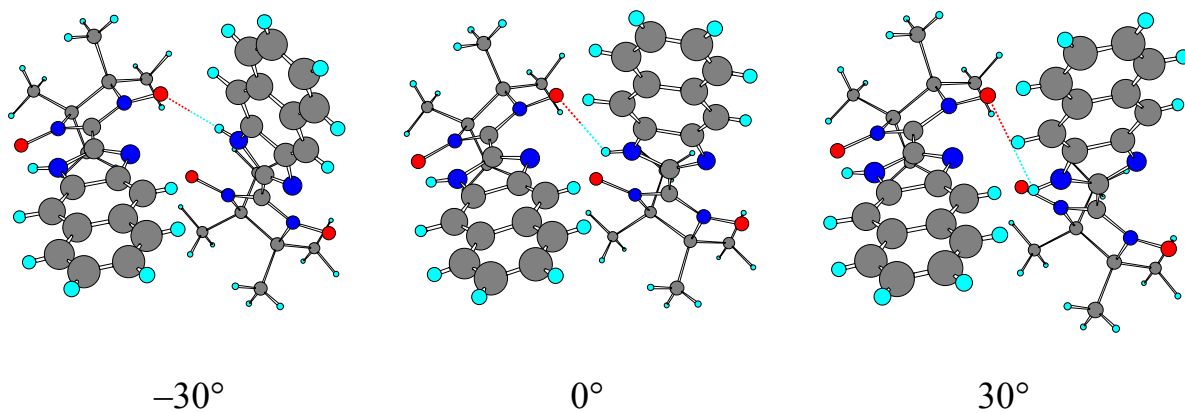

**Figure 2S.** Angular dependence of calculated  $J$  values (O: UB3LYP/4-31G; ●: UBLYP/4-31G).

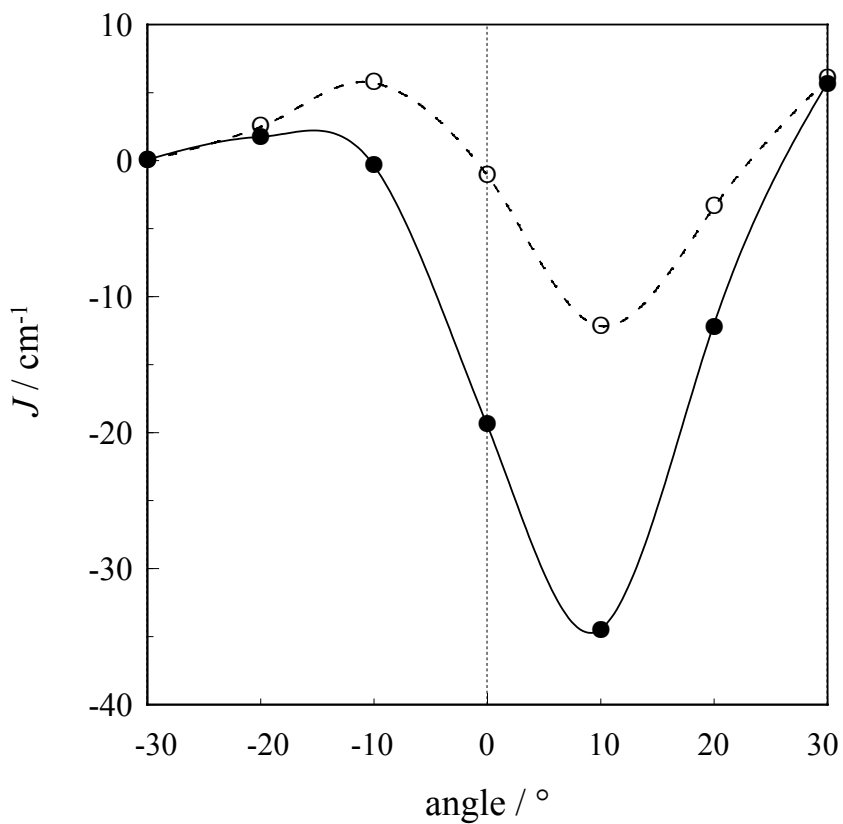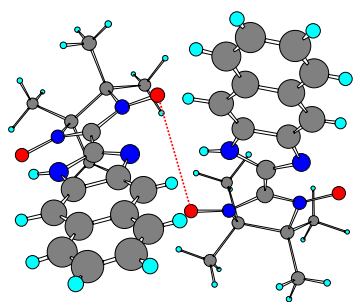

-30°

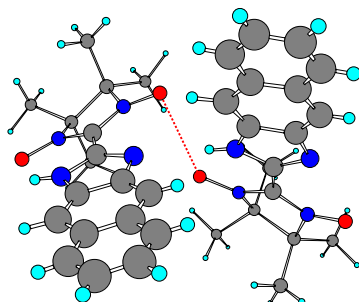

0°

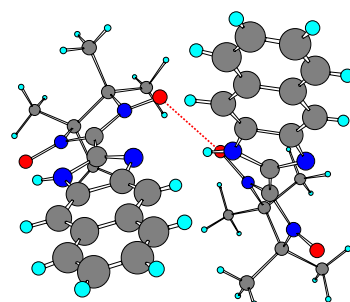

30°

**Figure 3S.** Angular dependence of calculated  $J$  values (O: UB3LYP/4-31G; ●: UBLYP/4-31G).
